# Supplementary material for: Manipulating the surface structure of quantum dots based on dual response modes triggered by iron ions for the visualization of hydrogen sulfide with a wide detection range
Source: Royal Society of Chemistry journal article supplement (doi:10.1039/d5ce00048c), 2025-01-01
Supplement: d5ce00048c1.pdf [file d5ce00048c1.pdf]

1                                          Electronic Supplementary Information

2    Manipulating surface structure of quantum dots based on  
3    dual response modes triggered by iron ions for visualization  
4    of hydrogen sulfide with a wide detection range

5    Cong Liu, ‡<sup>ac</sup> Rongxiang Feng, ‡<sup>a</sup> Shidi Li, <sup>a</sup> Fengyao Wu, <sup>a</sup> Xiaofei Qi, <sup>a</sup> Xiaohua  
6    Huang, <sup>a</sup> Tianyu Bai, <sup>\*a</sup> and Shanghua Xing <sup>b</sup>

7    <sup>a</sup>College of Medical Laboratory, Dalian Medical University, No. 9 West Section  
8    Lvshun South Road, Dalian 116044, P. R. China.

9    <sup>b</sup>Academy of Food Interdisciplinary Science, School of Food Science and Technology,  
10    Dalian Polytechnic University, Dalian 116034, P. R. China.

11    <sup>c</sup>Department of Clinical Lab, Tianjin Children`s Hospital (Children`s Hospital, Tianjin  
12    University), Tianjin 300134, P. R. China.

13

14    ‡ Cong Liu and Rongxiang Feng contributed equally to this work.

15    <sup>\*</sup>Corresponding Author

16    E-mail: bty16@dmu.edu.cn

17

## 18 **Experimental section**

### 19 **Materials**

20 Copper(II) chloride dihydrate ( $\text{CuCl}_2 \cdot 2\text{H}_2\text{O}$ , 99%), indium(III) chloride tetrahydrate  
21 ( $\text{InCl}_3 \cdot 4\text{H}_2\text{O}$ , 99.9%), zinc acetate ( $\text{Zn}(\text{Ac})_2$ , 99.98%), sodium sulfide nonahydrate  
22 ( $\text{Na}_2\text{S} \cdot 9\text{H}_2\text{O}$ , 96+%), glutathione (GSH, 97%), iron(III) chloride ( $\text{FeCl}_3$ , 98%), 1,10-  
23 phenanthroline (Phen, 99%), ferrous sulfate ( $\text{FeSO}_4$ , 99%), L-cysteine (Cys, 99%),  
24 dithiothreitol (DTT, 99%), 3-mercaptopropionic acid (3-MPA, 98%), and sodium  
25 nitroprusside (SNP, 98%) were purchased from Energy Chemical. Sodium chloride  
26 ( $\text{NaCl}$ , 99.5+%), sodium fluoride ( $\text{NaF}$ , 99%), potassium bromide ( $\text{KBr}$ , 99+%),  
27 potassium iodide ( $\text{KI}$ , 99.5%), sodium acetate ( $\text{NaAc}$ , 99.5%), sodium carbonate  
28 ( $\text{Na}_2\text{CO}_3$ , 99.8+%), sodium bicarbonate ( $\text{NaHCO}_3$ , 99.5%), monopotassium phosphate  
29 ( $\text{KH}_2\text{PO}_4$ , 99.5%), disodium phosphate ( $\text{Na}_2\text{HPO}_4$ , 99+%), potassium nitrate ( $\text{KNO}_3$ ,  
30 99%), sodium sulfite ( $\text{Na}_2\text{SO}_3$ , 98+%), sodium sulfate ( $\text{Na}_2\text{SO}_4$ , 99+%), potassium  
31 thiocyanate ( $\text{KSCN}$ , 98.5+%), sodium thiosulfate ( $\text{Na}_2\text{S}_2\text{O}_3$ , 98%), and sodium  
32 hydroxide ( $\text{NaOH}$ , 98%) were purchased from Sinopharm Chemical Reagent Co., Ltd.  
33 Trypsin (TRY, EC 3.4.4.4, 250 U  $\text{mg}^{-1}$ ), Dulbecco's modified Eagle's medium  
34 (DMEM), fetal calf serum (FBS) and cell counting Kit-8/CCK8 were purchased from  
35 Dalian Chenyu Biotechnology. All chemical were used as received without further  
36 treatment.

### 37 **Synthesis of $\text{CuInS}_2/\text{ZnS}$ quantum dots**

38 The synthesis of  $\text{CuInS}_2/\text{ZnS}$  quantum dots (CIS/ZnS QDs) refers to An` developed  
39 method with slight modification, which can be viewed in our previous research  
40 report.<sup>1-2</sup>

41 **Cell viability assay**

42 MCF-7 cells were provided by the Biological Laboratory of Dalian Medical University.  
43 We carried out CCK-8 assay to evaluate the cytotoxicity of the CIS/ZnS QDs against  
44 Hela cells. Briefly, cells were seeded at  $2.5 \times 10^4$  cells/well in 96-well plates and  
45 incubated at 37 °C for 24 h. Then, a fresh cultured DMEM medium (100  $\mu$ L) containing  
46 CIS/ZnS QDs samples with concentrations of 0.07, 0.14, 0.28, 0.35, 0.42  $\mu$ g/mL was  
47 added to plate and co-incubated with the cells for 12, 24 and 48 h, respectively. After  
48 incubation, 100  $\mu$ L fresh DMEM solutions containing 10  $\mu$ L reagents was added to each  
49 well and incubated at 37 °C for 1h. Finally, a microplate reader (Bio-Rad, Model, 550,  
50 USA) was used to measure the absorbance at 450 nm. The free-QDs groups and culture  
51 medium (without cells and CIS/ZnS QDs) was marked as control and blank  
52 respectively, and incubated at the same conditions. The relative cell viability can be  
53 calculated with the following equation:

54 
$$\text{cell viability (\%)} = \frac{A_s - A_b}{A_c - A_b} \times 100\%$$

55 where  $A_s$ ,  $A_c$  and  $A_b$  are the absorbance of the test, control and blank sample.

56 **Characterization**

57 UV-vis absorption spectra were measured with a sp-2500 spectrophotometer (Shanghai  
58 Spectrum Instruments Co. ltd., China). Photoluminescence (PL) emission spectra were  
59 recorded on Hitachi F-4700 Fluorescence Spectrophotometer under the excitation  
60 wavelength of 410 nm. Fluorescence images were taken with an Olympus TH4-200  
61 fluorescent inverted microscope at an excitation wavelength of 530-550 nm and imaged  
62 with the emission wavelength from 575 nm to near infrared region.

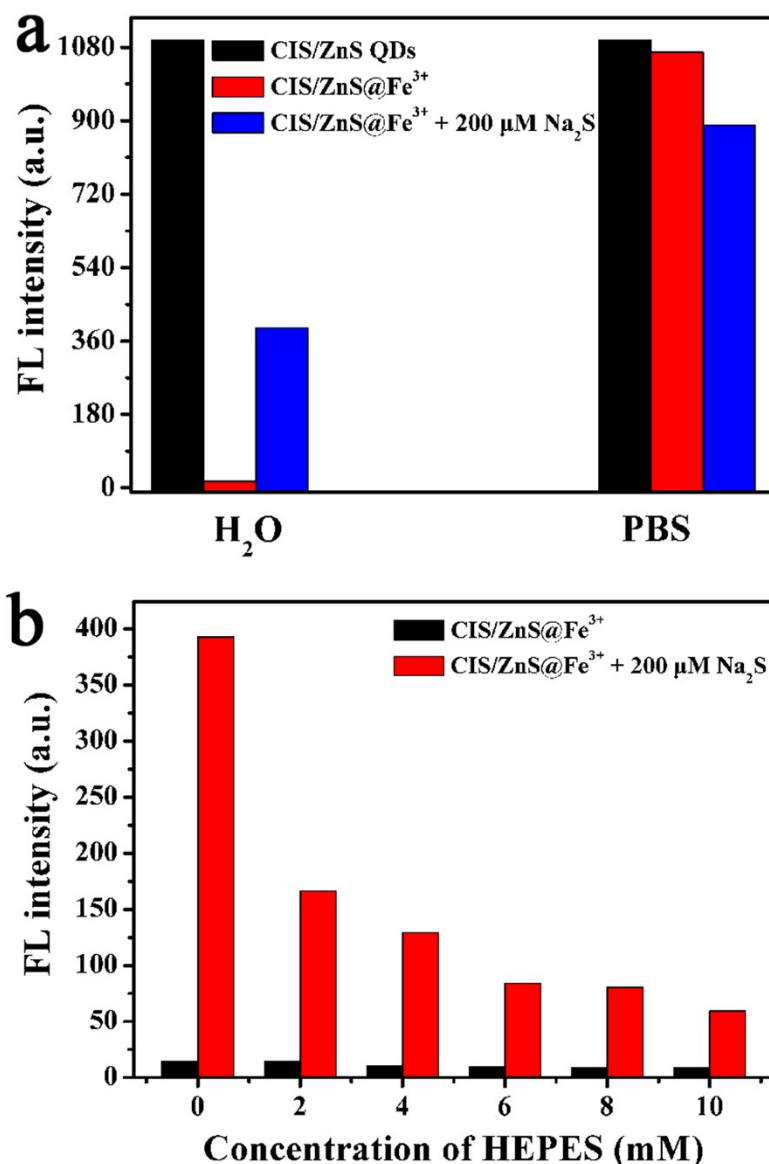

63

64 **Fig. S1** (a) The emission peak intensity of CIS/ZnS QDs (black column), CIS/ZnS@Fe-  
 65 200 nanoprobe (red column), and CIS/ZnS@Fe-200 nanoprobe upon the addition of  
 66 200 μM Na<sub>2</sub>S (blue column) in the case of aqueous and PBS buffer (pH = 7.4, 10 mM)  
 67 medium, respectively; (b) The emission peak intensity of CIS/ZnS@Fe-200 nanoprobe  
 68 before (black column) and after (red column) adding 200 μM Na<sub>2</sub>S in different  
 69 concentration of HEPES buffers (pH = 7.4).

70

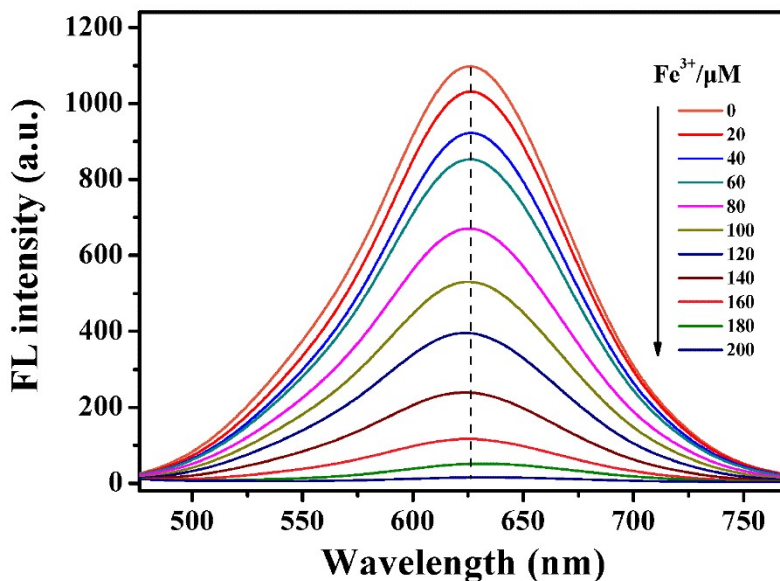

71

72 **Fig. S2** Fluorescent titration spectra of CIS/ZnS QDs upon gradual addition of Fe<sup>3+</sup> (0-  
 73 200 μM) in the aqueous medium.

74

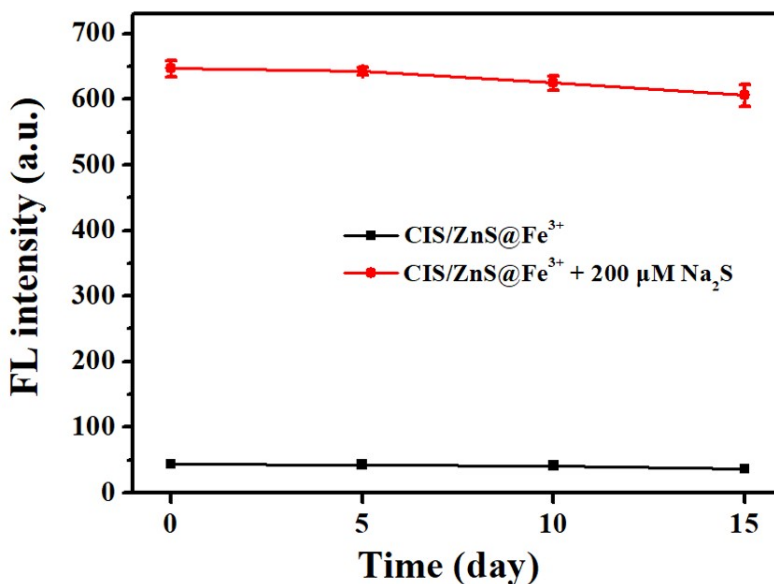

75

76 **Fig. S3** The fluorescent intensity before (black line) and after (red line) adding 200 μM  
 77 Na<sub>2</sub>S for the CIS/ZnS@Fe-180 nanoprobe, which were prepared by the CIS/ZnS QDs  
 78 that storing in a refrigerator at 4 °C for 0, 5, 10 and 15-day respectively.

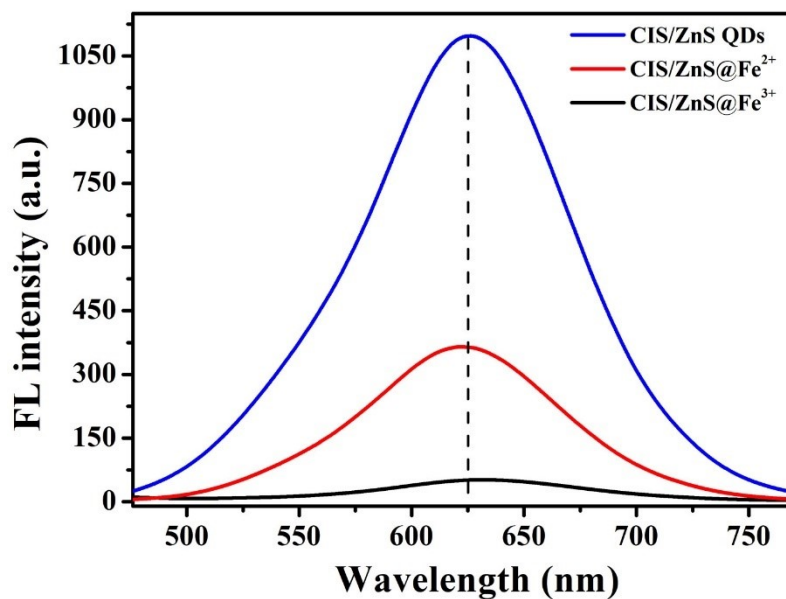

79

80 **Fig. S4** The fluorescent spectra of CIS/ZnS QDs (blue line), CIS/ZnS QDs treated by  
 81 180  $\mu\text{M}$   $\text{Fe}^{3+}$  (CIS/ZnS@ $\text{Fe}^{3+}$ , black line) and 180  $\mu\text{M}$   $\text{Fe}^{2+}$  (CIS/ZnS@ $\text{Fe}^{2+}$ , red line)

82

83

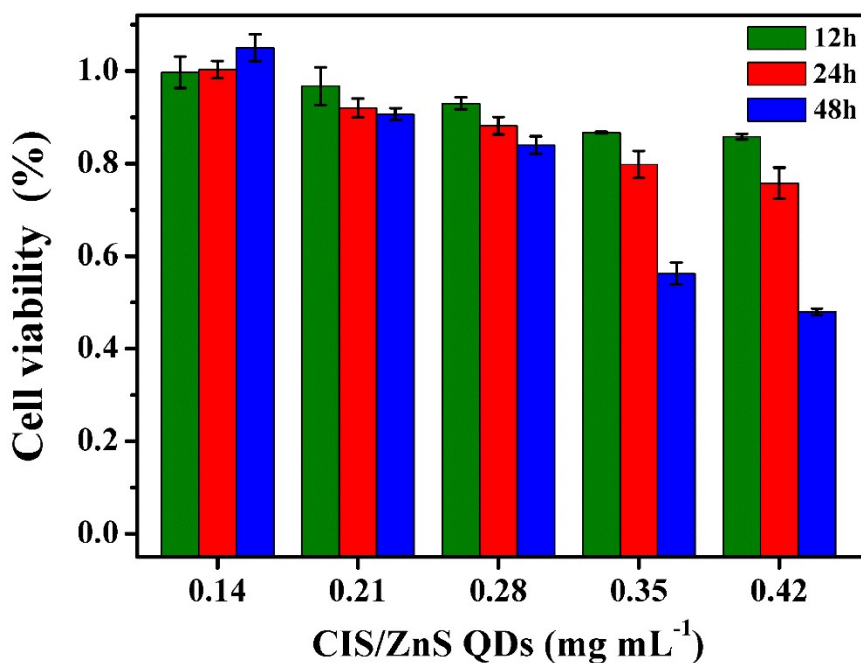

84

85 **Fig. S5** The cell viability of CIS/ZnS QDs with concentration of 0.14, 0.21, 0.28, 0.35  
 86 and 0.42 mg mL<sup>-1</sup> at different incubation time.

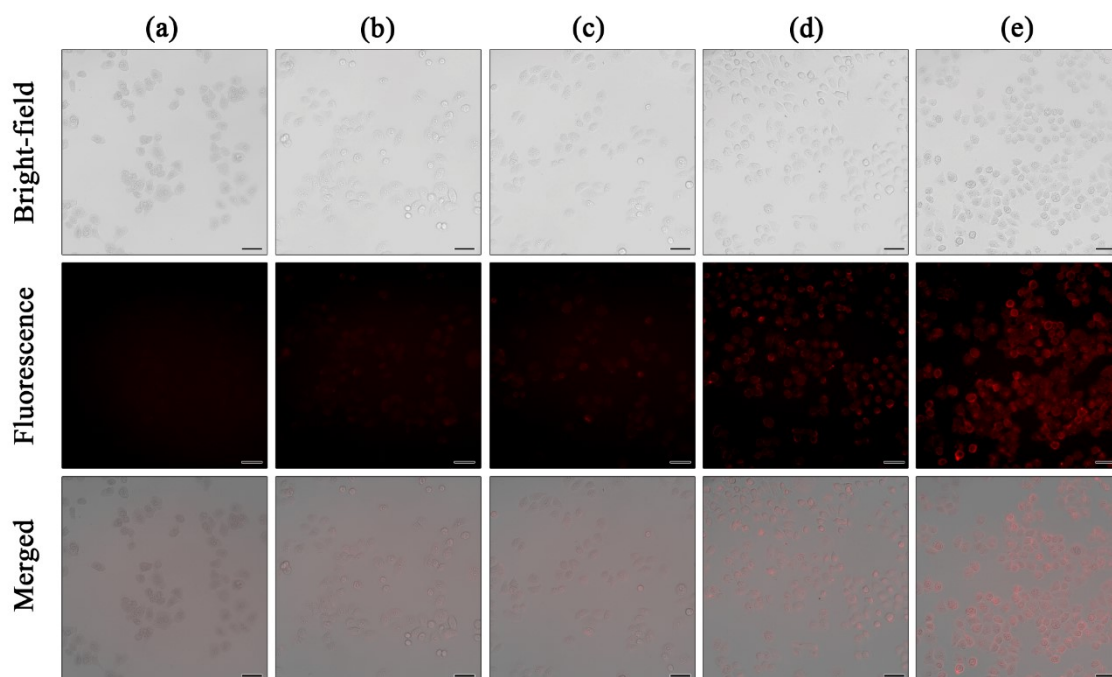

87

88 **Fig. S6** Fluorescence images of MCF-7 cells. From left to right: CIS/ZnS@Fe-200

89 labeled cells incubated with exogenous 200  $\mu\text{M}$   $\text{Na}_2\text{S}$  for (a) 0 min, (b) 5 min, (c) 10min,

90 (d) 20 min and (e) 50 min. All scale bars = 100  $\mu\text{m}$ .

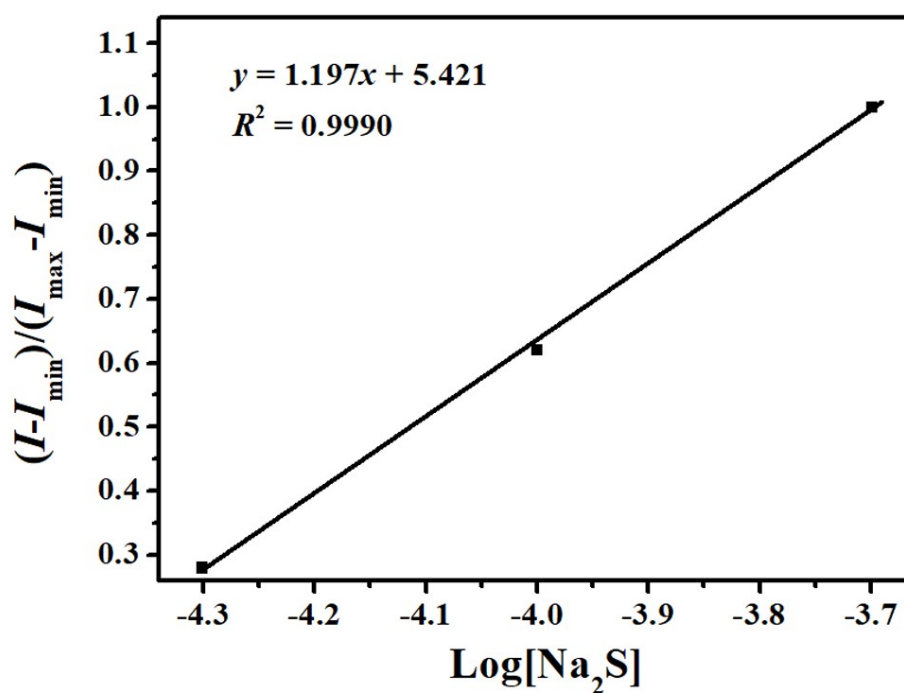

91

92 **Fig. S7** The regression curve of normalized emission peak intensity obtained by using

93 Image J software versus the logarithm of exogenous Na<sub>2</sub>S in MCF-7 cells.

94

95 **Table S1** The detection performance of representatively reported fluorescent turn-on  
96 H<sub>2</sub>S bio-probes

| No. | Probe                | LOD (μM)  | Linear range (μM) | Ref.             |
|-----|----------------------|-----------|-------------------|------------------|
| 1   | CLSS-2               | 4.6 ± 2.0 | 0-250             | [3]              |
| 2   | Mn-doped ZnS QDs     | 0.2       | 2-100             | [4]              |
| 3   | TPP-H <sub>2</sub> S | 0.12      | 0.5-20            | [5]              |
| 4   | BH-HS                | 1.7       | 0-40              | [6]              |
| 5   | Ag-NPs@DNA-FAM       | 0.01      | 0.01-100          | [7]              |
| 6   | Flu-N <sub>3</sub>   | 0.031     | 0-140             | [8]              |
| 7   | CdTe QDs/AgNP        | 0.015     | 0.0495-5.2        | [9]              |
| 8   | Mito-NIR-SH          | 0.0893    | 0-30              | [10]             |
| 9   | Lyso-HA-HS           | 0.34      | 0-40              | [11]             |
| 10  | SXR                  | 0.70      | 0-80              | [12]             |
| 11  | QCy7-HS              | 1.0       | 0-14              | [13]             |
| 12  | SNARF-SeSPy          | 0.034     | 0-20              | [14]             |
| 13  | TPA-Pz-NBD           | 0.70      | 0-125             | [15]             |
| 14  | NT-SH                | 0.080     | 0-50              | [16]             |
| 15  | CMHS                 | 0.23      | 0-260             | [17]             |
| 16  | CPs/MOFs             | 7.2       | 0-80              | [18]             |
| 17  | NTR-HS               | 0.104     | 3.33-20           | [19]             |
| 18  | SS-N <sub>3</sub>    | 0.010     | 0-80              | [20]             |
| 19  | RDM-HS               | 0.31      | 0-80              | [21]             |
| 20  | ER-Nap-NBD           | 5.2       | 0-450             | [22]             |
| 21  | T-HS                 | 3.6       | 0-100             | [23]             |
| 22  | WFP-PC               | 0.47      | 0-20              | [24]             |
| 23  | DCI-Br-NBD           | 0.40      | 0-50              | [25]             |
| 24  | CFB-H <sub>2</sub> S | 0.046     | 0-100             | [26]             |
| 25  | HN8DNP               | 0.31      | 0-50              | [27]             |
| 26  | DCM-H <sub>2</sub> S | 0.13      | 5-50              | [28]             |
| 27  | CIS/ZnS@Fe-160       | 0.68      | 0-300             | <b>This work</b> |
| 28  | CIS/ZnS@Fe-180       | 0.68      | 0-300             | <b>This work</b> |
| 29  | CIS/ZnS@Fe-200       | 0.70      | 0-300             | <b>This work</b> |

97

#### 98 **Additional References:**

99 [1] X. An, Y. Zhang, J. Wang, D. M. Kong, X. W. He, L. Chen and Y. Zhang, *ACS*  
100 *Omega*, 2021, **6**, 17501-17509.

101 [2] R. Li, X. Qi, F. Wu, C. Liu, X. Huang, T. Bai and S. Xing, *Anal. Chim. Acta*, 2024,



102 **1287**, 342121.

103 [3] T. S. Bailey and M. D. Pluth, *J. Am. Chem. Soc.*, 2013, **135**, 16697-166704.

104 [4] P. Wu, J. Zhang, S. Wang, A. Zhu and X. Hou, *Chem. Eur. J.*, 2014, **20**, 952-956.

105 [5] Q. Chen, J. Yang, Y. Li, J. Zheng and R. Yang, *Anal. Chim. Acta*, 2015, **896**, 128-  
106 136.

107 [6] M. Ren, B. Deng, X. Kong, K. Zhou, K. Liu, G. Xu and W. Lin, *Chem. Commun.*,  
108 2016, **52**, 6415-6418.

109 [7] Y. Dong, L. Wang, F. Wang, N. Li, Y. Jin, J. Zhang and X. Yang, *Analyst*, 2017,  
110 **142**, 4703-4707.

111 [8] Q. Zhao, F. Huo, J. Kang, Y. Zhang and C. Yin, *J. Mater. Chem. B*, 2018, **6**, 4903-  
112 4908.

113 [9] Y. Wu, Q. Wang, T. Wu, W. Liu, H. Nam, S. Xu and Y. Shen, *ACS Appl. Mater.*  
114 *Interfaces*, 2018, **10**, 43472-43481.

115 [10] X. Zhao, Y. Li, Y. Jiang, B. Yang, C. Liu and Z. Liu, *Talanta*, 2019, **197**, 326-333.

116 [11] M. Ren, Z. Li, B. Deng, L. Wang and W. Lin, *Anal. Chem.*, 2019, **91**, 2932-2938.

117 [12] X. Song, Y. Wang, J. Ru, Y. Yang, Y. Feng, C. Cao, K. Wang, G. Zhang and W.  
118 Liu, *Sens. Actuators B Chem.*, 2020, **312**, 127982.

119 [13] D. Su, D. Cheng, Y. Lv, X. Ren, Q. Wu and L. Yuan, *Spectrochim. Acta A Mol.*  
120 *Biomol. Spectrosc.*, 2020, **226**, 117635.

121 [14] X. Zhang, W. Qu, H. Liu, Y. Ma, L. Wang, Q. Sun and F. Yu, *Anal. Chim. Acta*,  
122 2020, **1109**, 37-43.

123 [15] S. Pei, J. Li, C. Zhang, W. Liang, G. Zhang, L. Shi, W. Wang, S. Shuang and C.

124 Dong, *Analyst*, 2021, **146**, 2138-2143.

125 [16] Q. Sun, H. Liu, Y. Qiu, J. Chen, F. Wu, X. Luo and D. Wang, *Spectrochim. Acta*  
126 *A Mol. Biomol. Spectrosc.*, 2021, **254**, 119620.

127 [17] L. Ou, R. Guo and W. Lin, *Anal. Methods*, 2021, **13**, 1511-1516.

128 [18] S. Saha, P. K. Roy, K. Maity, M. Mandal and K. Biradha, *Chem. Eur. J.*, 2022, **28**,  
129 e202103830.

130 [19] B. Li, M. Wang, X. Gu, J. Chen, X. Yang, X. Liu and K. Xu, *Microchim. Acta*,  
131 2022, **189**, 291.

132 [20] J. Peng, Q. Ju, B. An, Z. Yin, N. Wei and Y. Zhang, *Talanta*, 2022, **250**, 123741.

133 [21] K. Wang, X. Yang, M. Guo, X. Chen, T. Li, R. Yan, Y. Yang, H. Zhu and Z. Hu,  
134 *Sens. Actuators B Chem.*, 2022, **369**, 132285.

135 [22] Y. S. Kafuti, S. Zeng, X. Liu, J. Han, M. Qian, Q. Chen, J. Wang, X. Peng, J. Yoon,  
136 H. Li, *Chem. Commun.*, 2023, **59**, 2493-2496.

137 [23] C. Xu, Y. Zhang, H. Sun, J. Ai and M. Ren, *Anal. Methods*, 2023, **15**, 1948-1952.

138 [24] M. Wang, J. Chen, X. Gu, X. Yang, J. Fu and K. Xu, *Spectrochim. Acta A Mol.*  
139 *Biomol. Spectrosc.*, 2023, **295**, 122587.

140 [25] Y. Xiao, P. Wang, Q. Wang, N. Ma, S. Feng, G. Zhang and Y. Gong, *Sens.*  
141 *Actuators B Chem.*, 2023, **396**, 134515.

142 [26] F. Chu, B. Feng, M. Liu, M. Liu, F. Chen, J. Dong and W. Zeng, *Dyes Pigments*,  
143 2024, **222**, 111894.

144 [27] Q. Wang, P. Wang, Y. Xiao, S. Feng, G. Zhang and Y. Gong, *Talanta*, 2024, **271**,  
145 125734.

146 [28] Y. Wang, J. Wang, R. Liu, J. Chen, Y. Shu, J. Wang and H. Qiu, *Microchem. J.*,

147 2024, **199**, 109950.
